# Supplementary material for: Influence of the Core/Shell Structure of Indium Phosphide Based Quantum Dots on Their Photostability and Cytotoxicity
Source: PubMed Central journal article supplement (PMC6610543; doi:10.3389/fchem.2019.00466), 2019-06-27
Supplement: Presentation_1.pdf [file Presentation_1.pdf]

## Supporting Information for

### Influence of the core/shell structure of indium phosphide based quantum dots on their photostability and cytotoxicity

K. David Wegner,<sup>1,\*</sup> Fanny Dussert,<sup>2</sup> Delphine Truffier-Boutry,<sup>3</sup> Anass Benayad,<sup>3</sup> David Beal,<sup>2</sup> Lucia Mattera,<sup>1</sup> Wai Li Ling,<sup>4</sup> Marie Carrière,<sup>2,\*</sup> Peter Reiss<sup>1,\*</sup>

<sup>1</sup>Univ. Grenoble Alpes, CEA, CNRS, IRIG, SyMMES, STEP, 38000 Grenoble, France

<sup>2</sup>Univ. Grenoble Alpes, CEA, CNRS, IRIG, SyMMES, CIBEST, 38000 Grenoble, France

<sup>3</sup>Univ. Grenoble Alpes, CEA-LITEN L2N, 17 rue des Martyrs, 38000 Grenoble, France

<sup>4</sup>Univ. Grenoble Alpes, CEA, CNRS, IRIG, IBS, 38000 Grenoble, France

\*Emails: [wegner.karldavid@gmail.com](mailto:wegner.karldavid@gmail.com), [marie.carriere@cea.fr](mailto:marie.carriere@cea.fr), [peter.reiss@cea.fr](mailto:peter.reiss@cea.fr)

#### Photophysical characterization of the QDs

**Table S1:** Summary of the photophysical properties of the InP-based QDs with different shells after the synthesis.

| (in nm)          | ZnSeS | ZnSeS/ZnS thin | ZnSeS/ZnS thick |
|------------------|-------|----------------|-----------------|
| 1st Exciton peak | 522   | 518            | 522             |
| PL maxima        | 564   | 556            | 555             |
| FWHM             | 63.2  | 57.5           | 57.1            |

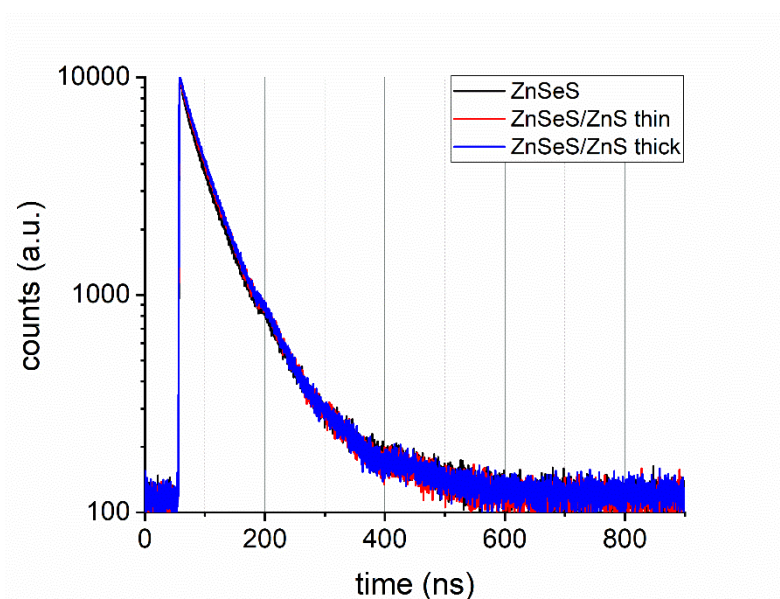

**Figure S1:** PL decay curves of InZnP QDs with ZnSeS (black), ZnSeS/ZnS thin (red), and ZnSeS/ZnS thick (black) shell.

**Table S2:** Decay times and intensity averaged decay time of InZnP QDs with different shells.

| Shell           | $A_1$ | $\tau_1$ (ns) | $A_2$ | $\tau_2$ (ns) | $A_3$ | $\tau_3$ (ns) | $\tau_{\langle \text{int} \rangle}$ (ns) |
|-----------------|-------|---------------|-------|---------------|-------|---------------|------------------------------------------|
| ZnSeS           | 2.4   | 4.9           | 43.9  | 36.0          | 53.7  | 78.1          | <b>66.5</b>                              |
| ZnSeS/ZnS thin  | 1.4   | 5.7           | 53.3  | 39.7          | 45.3  | 82.2          | <b>66.7</b>                              |
| ZnSeS/ZnS thick | 0.9   | 4.2           | 53.3  | 39.5          | 45.9  | 79.0          | <b>64.5</b>                              |

Alumina-coated CSS QDs

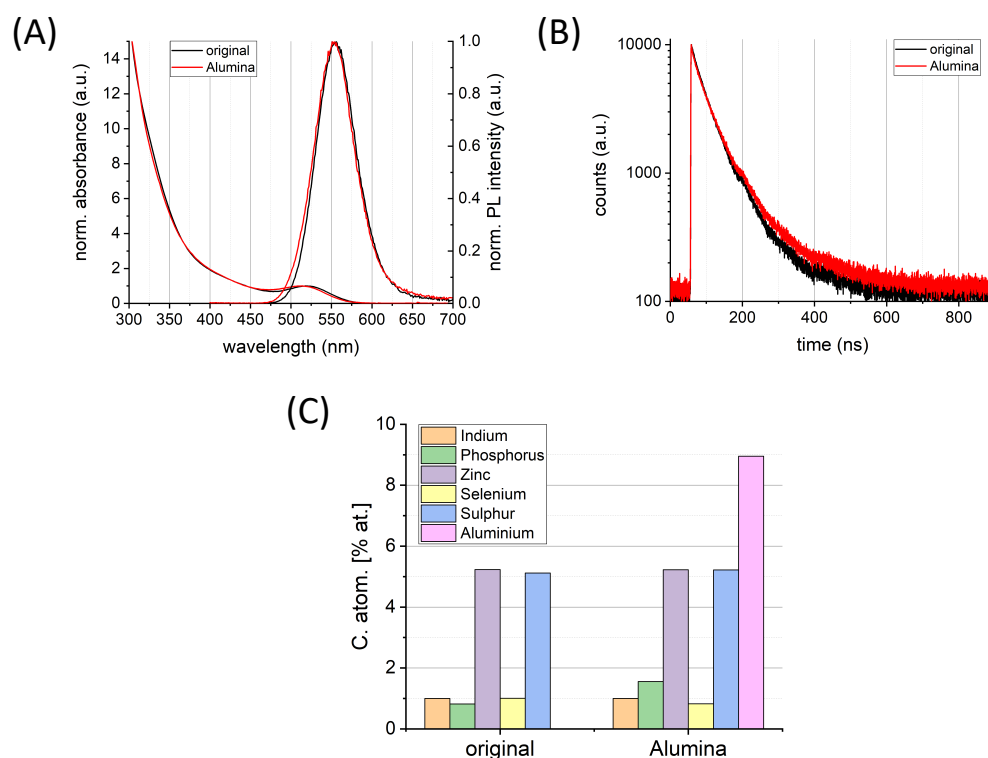

**Figure S2:** Comparison of normalized absorbance and PL spectra (A), PL decay curves (B), and EDX compositional analysis (C) of the InZnP/ZnSeS/ZnS thin QDs (original) and when using aluminum in the synthesis (Alumina).

**Table S3:** Decay times of the InZnP/ZnSeS/ZnS thin (original) and when using aluminum in the synthesis (Alumina).

| Shell    | $A_1$ | $\tau_1$ (ns) | $A_2$ | $\tau_2$ (ns) | $A_3$ | $\tau_3$ (ns) | $\tau_{\langle \text{int} \rangle}$ (ns) |
|----------|-------|---------------|-------|---------------|-------|---------------|------------------------------------------|
| original | 1.4   | 5.7           | 53.3  | 39.7          | 45.3  | 82.2          | <b>66.7</b>                              |
| Alumina  | 2.6   | 6.3           | 61.7  | 45.9          | 35.8  | 109.7         | <b>82.8</b>                              |

Photostability measurements in PMMA

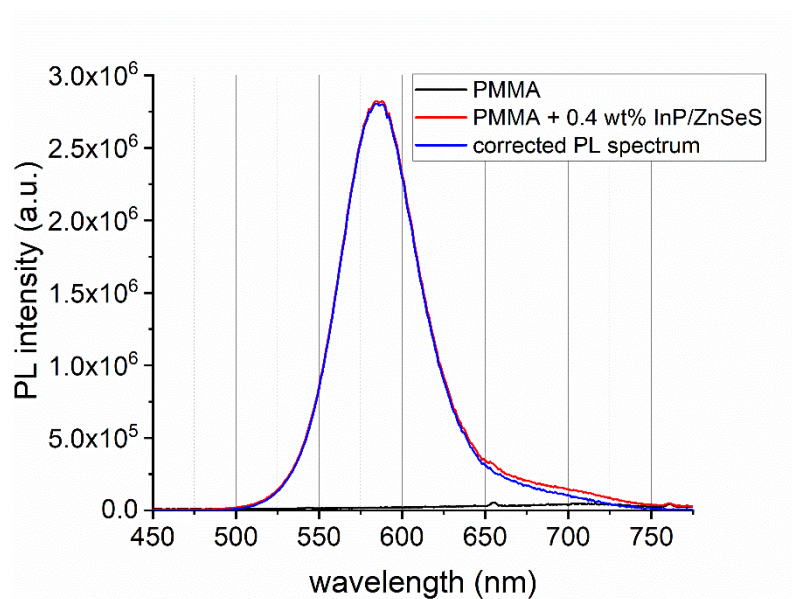

**Figure S3:** PL spectra of the pristine PMMA film (black), PMMA with 0.4 wt% InZnP/ZnSeS gradient shell QDs (red), and after subtraction of the PMMA reference signal (blue), demonstrating that the polymer matrix does not influence the PL properties.

**Table S4:** Quantum yield of the PMMA films with increasing InZnP/ZnSeS QD concentration.

| [QD] (wt%) | Quantum yield (%) |
|------------|-------------------|
| 0.05       | 3.2               |
| 0.075      | 3.4               |
| 0.1        | 4.2               |
| 0.2        | 4.1               |
| 0.4        | 5.3               |

(A)

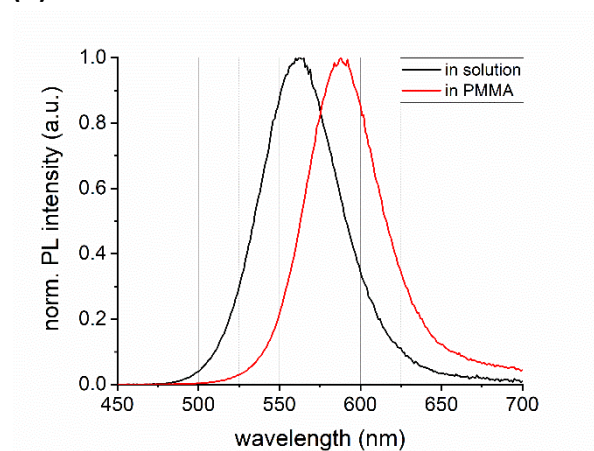

|           | In solution | In PMMA |
|-----------|-------------|---------|
| PL maxima | 562 nm      | 588 nm  |
| FWHM      | 56.8 nm     | 53.1 nm |
| QY (%)    | 50.9        | 7.6     |

(B)

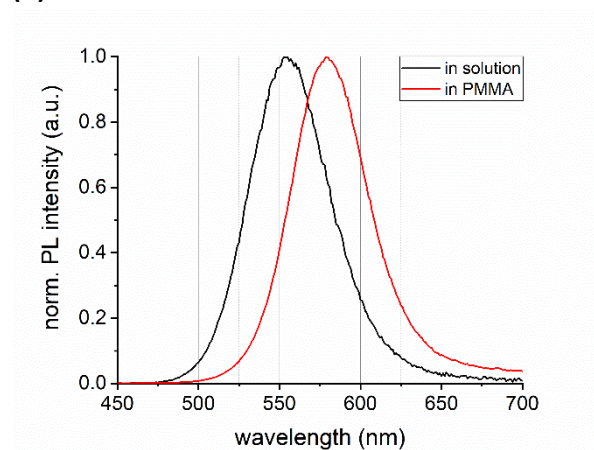

|           | In Hexane | In PMMA |
|-----------|-----------|---------|
| PL maxima | 551 nm    | 565 nm  |
| FWHM      | 58.9 nm   | 53.5 nm |
| QY (%)    | 48.8      | 10.1    |

(C)

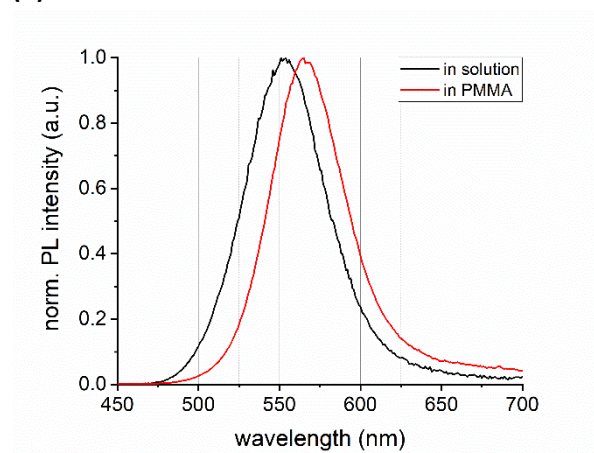

|           | In Hexane | In PMMA |
|-----------|-----------|---------|
| PL maxima | 555 nm    | 579 nm  |
| FWHM      | 57.2 nm   | 55.2 nm |
| QY (%)    | 64        | 16.9    |

**Figure S4:** Comparison of the PL spectra and photophysical properties of InZnP/ZnSeS QDs (A), InZnP/ZnSeS/ZnS-alumina QDs (B), and InZnP/ZnSeS/ZnS (thick) QDs (C) in solution and embedded in the PMMA matrix.

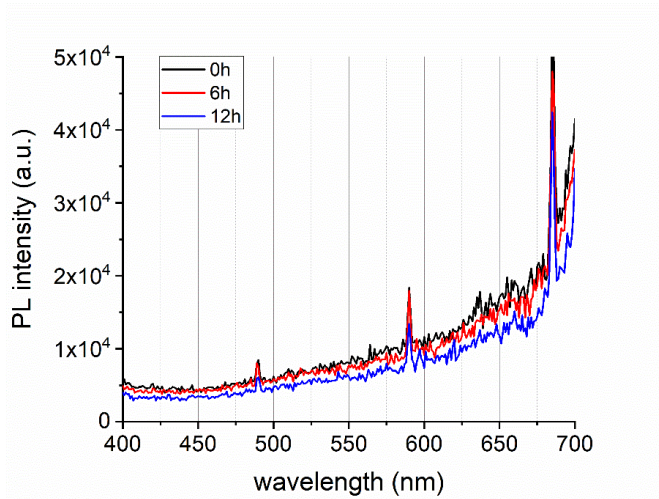

**Figure S5:** PL spectra of PMMA without QDs after 0h, 6h and 12h of illumination in the climate chamber.

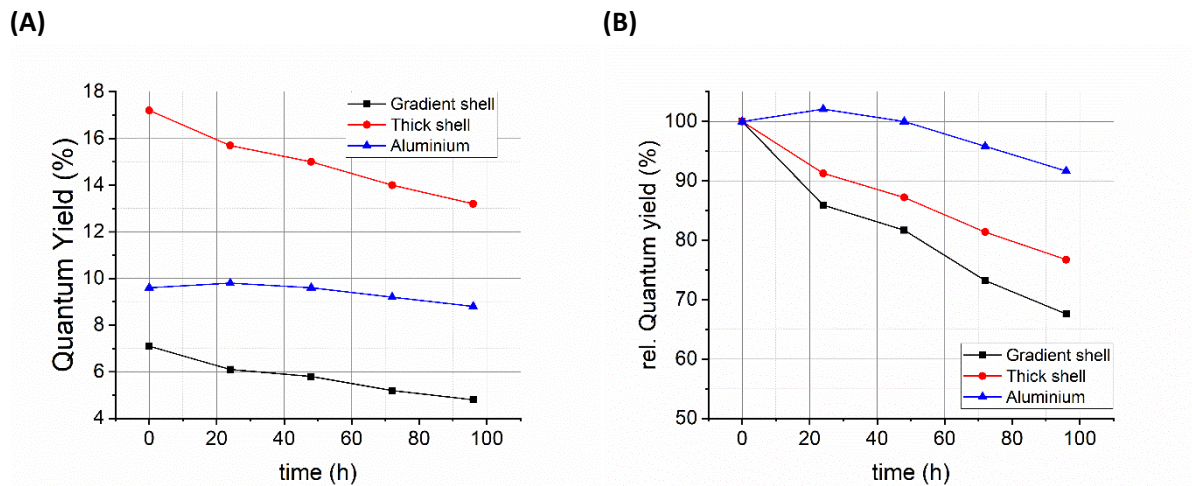

**Figure S6:** Evolution of quantum yield (A) and relative quantum yield (B) of the InZnP QDs with different shells embedded in PMMA kept in the dark and at room temperature.

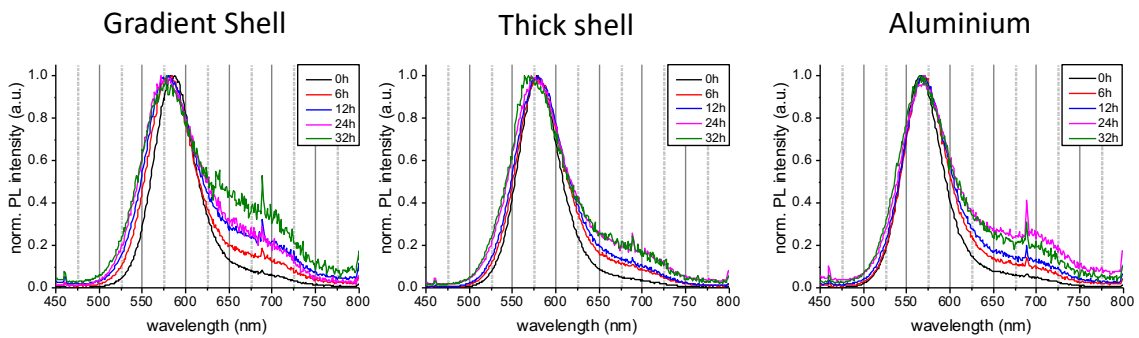

**Figure S7:** Evolution of the normalized PL spectra of the three systems during continuous irradiation in the aging chamber.

**Table S5:** Atomic concentrations determined by XPS.

| Atomic concentration |      |     |     |     |
|----------------------|------|-----|-----|-----|
|                      | C-C  | C-H | C-O | COO |
| Gradient 0h          | 96.3 | 0.5 | 0.7 | 2.5 |
| Gradient 6h          | 83.5 | 8.0 | 3.4 | 5.1 |
| Aluminium 0h         | 86.0 | 5.9 | 3.1 | 5.0 |
| Aluminium 6h         | 82.2 | 7.0 | 4.1 | 6.7 |

| Atomic concentration |      |      |       |        |      |                                    |                 |
|----------------------|------|------|-------|--------|------|------------------------------------|-----------------|
|                      | ZnS* | Zn   | ZnSe* | ZnSSe* | In*S | In <sub>(x)</sub> O <sub>(y)</sub> | SO <sub>4</sub> |
| Gradient 0h          | 24.7 | 29.9 | 13.0  | ---    | 13.4 | 4.9                                | 14.0            |
| Gradient 6h          | 18.7 | 34.4 | 11.8  | ---    | 5.3  | 13.6                               | 16.2            |
| Aluminium 0h         | 21.7 | 59.3 | 5.2   | 4.7    | 4.0  | 5.1                                | ---             |
| Aluminium 6h         | 22.0 | 56.1 | 5.0   | 5.8    | 3.2  | 7.9                                | ---             |

### Phase transfer with Penicillamine

**Table S6:** Summary of the photophysical properties of the InZnP QDs with different shell before (original) and after phase transfer (Pen).

| (in nm)          | ZnSeS    |      | ZnSeS/ZnS thin |      | ZnSeS/thick |     |
|------------------|----------|------|----------------|------|-------------|-----|
|                  | original | Pen  | original       | Pen  | original    | Pen |
| 1st Exciton peak | 522      | 518  | 518            | 518  | 522         | 518 |
| PL maxima        | 564      | 578  | 556            | 568  | 555         | 564 |
| FWHM             | 63.2     | 66.2 | 57.5           | 61.3 | 57.1        | 60  |
| Stokes shift     | 42       | 60   | 38             | 50   | 33          | 46  |

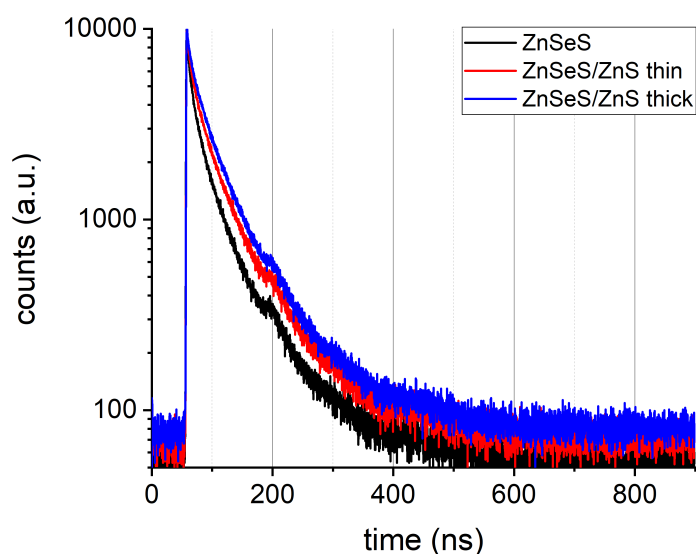**Figure S8:** PL decay curves of InZnP QDs with different shells after phase transfer using penicillamine.

**Table S7:** Decay times and intensity averaged decay time of InZnP QDs with different shells after phase transfer.

| Sample          | $A_1$ | $\tau_1$ (ns) | $A_2$ | $\tau_2$ (ns) | $A_3$ | $\tau_3$ (ns) | $\tau_{\langle \text{int} \rangle}$ (ns) |
|-----------------|-------|---------------|-------|---------------|-------|---------------|------------------------------------------|
| ZnSeS           | 8.8   | 3.3           | 41.2  | 22.1          | 50.0  | 68.8          | <b>58.7</b>                              |
| ZnSeS/ZnS thin  | 6.4   | 4.0           | 42.3  | 27.7          | 51.4  | 75.3          | <b>63.9</b>                              |
| ZnSeS/ZnS thick | 4.8   | 4.2           | 40.8  | 29.6          | 54.4  | 73.6          | <b>63.2</b>                              |

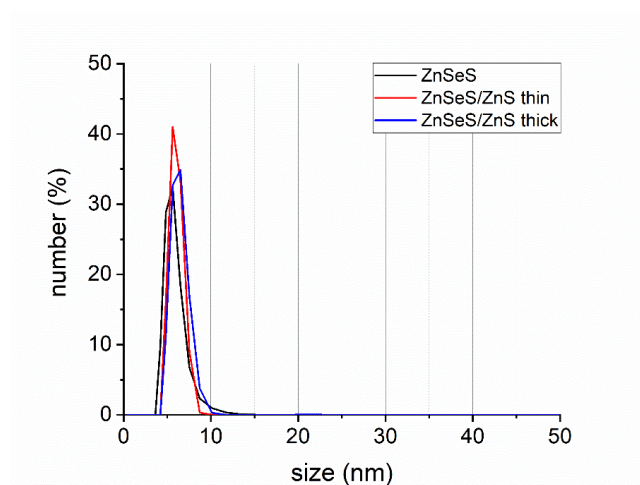

**Figure S9:** DLS measurements of the phase transferred InZnP QDs with different shells.

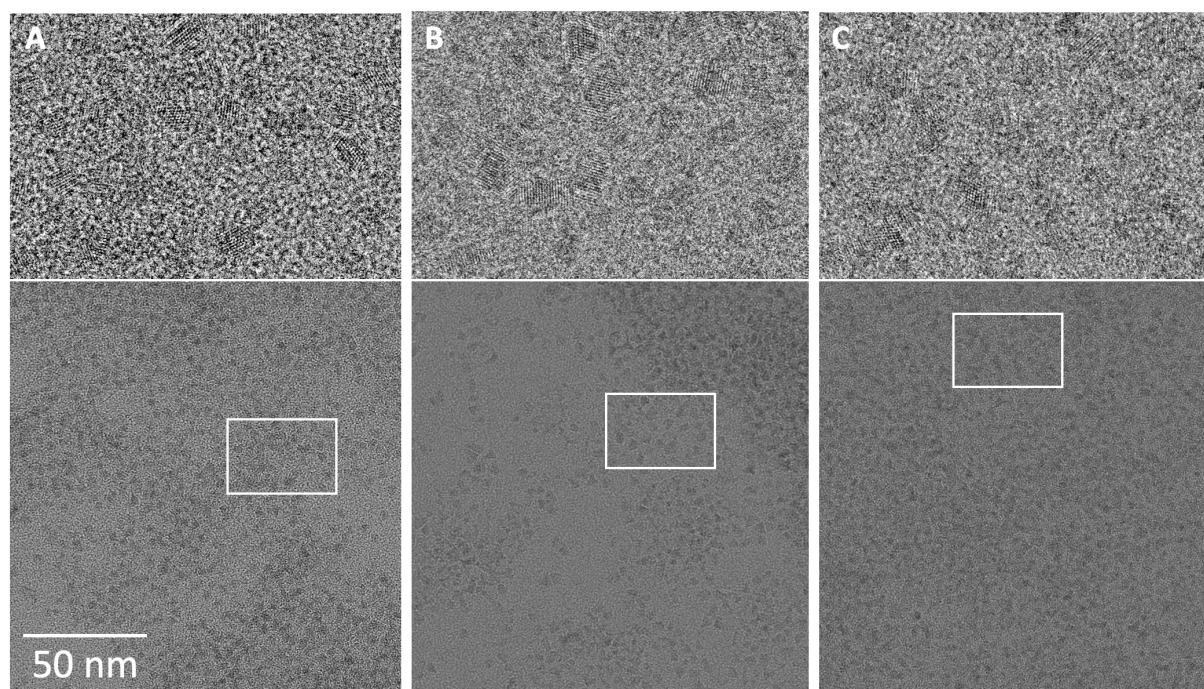

**Figure S10:** TEM images at different magnification of the different core/shell systems: A) InZnP/ZnSeS gradient shell, B) InZnP/ZnSeS/ZnS thin, C) InZnP/ZnSeS/ZnS thick.
